# Supplementary material for: Multidimensional and Longitudinal Impact of a Genetic Diagnosis for Critically Ill Infants
Source: medRxiv preprint, doi:10.1101/2024.06.29.24309646, version 1 (2024-07-01)
Supplement: Supplemental Table 2 [file 309646_file03.docx]

| **Supplemental Table 2** | | | | | | | |
| --- | --- | --- | --- | --- | --- | --- | --- |
|  | **Baseline** | **3 months** | | **6 months** | | **12 months** | |
|  |  | Diagnosed | Undiagnosed | Diagnosed | Undiagnosed | Diagnosed | Undiagnosed |
| Medical care costs  More than 5000  Less than 5000  Nothing  Don’t know | 9/110 (8.1%)  13/110 (11.8%)  67/110 (61%) | 11/23 (48%)  10/23 (44%)  2/23 (9%)  9 | 8/35 (23%)  20/35(57%)  7/35 (20%)  2  *p* = 0.14 | 6/19 (32%)  11/19 (58%)  2/19 (11%)  3 | 10/32 (31%)  19/32 (59%)  3/32 (9%)  1  *p* = 1.0 | 8/20 (40%)  12/20 (60%)  0/20 (0%)  5 | 7/24 (29%)  15/24 (63%)  2/24 (8%)  3  *p* = 0.52 |
| Financial problems  Yes  No  I don’t know | 28/110 (25.5%)  40/110 (36.4%)  42/110 (38.2%) | 11/32 (34%)  12/32(38%)  9/32 (28%) | 14 (37%)  20 (53%)  4 (11%)  *p* = 0.14 | 7/22 (32%)  10/22 (46%)  5/22 (23%) | 17/33 (52%)  12/33 (36%)  4/33 (12%)  *p* = 0.31 | 8/27 (30%)  17/27 (63%)  2/27 (7%) | 8/25 (32%)  13/25 (52%)  4/25 (16%)  *p* = 0.52 |
| Stop work  Yes  No  I don’t know | 55/110 (50.0%)  48/110 (43.6%)  7/110 (6.4%) | 14/30 (47%)  16/30 (53%)  2 | 16/38 (42%)  22/38 (58%)  *p* = 0.81 | 9/21 (43%)  12/21 (57%)  1 | 8/32 (25%)  24/32 (75%)  1  *p* = 0.23 | 9/25 (36%)  16/25 (64%) | 6/26 (23%)  20/26 (77%)  1  *p* = 0.36 |
| Cut down hours  Yes  No  I don’t know | 56/110 (50.9%)  47/110 (42.7%)  7/110 (6.4%) | 13/29 (45%)  16/29 (55%)  3 | 24/38 (63%)  14/38 (37%)  *p* = 0.15 | 9/21 (43%)  12/21 (57%)  1 | 17/32 (53%)  15/32 (47%)  1  *p* = 0.58 | 15/25 (60%)  10/25 (40%) | 12/26 (46%)  14/26 (54%)  1  *p* = 0.40 |
| Care coordination  More than 1 hour  Less than 1 hour  Around the clock  Don’t know | n/a | 15/32 (47%)  7/32 (22%)  4/32 (13%)  6/32 (19%) | 12/37 (32.4%)  8/37 (22%)  12/37 (32.4%)  5/37 (14%)  *p* = 0.26 | 8/22 (36%)  7/22 (32%)  4/22 (18%)  3/22 (14%) | 14/33 (42%)  13/33 (39%)  4/33 (12%)  2/33 (6%)  *p* = 0.68 | 10/25 (40%)  7/25 (28%)  6/25 (24%)  2/25 (8%) | 11/27 (41%)  12/27 (44%)  2/27 (7%)  2/27 (7%)  *p* = 0.36 |
| Avoid changing jobs  Yes  No  Don’t know | 22/110 (20.0%)  80/110 (72.7%)  8/110 (7.3%) | 10/30 (33%)  20/30 (67%)  2 | 16/38 (42%)  22/38 (58%)  *p* = 0.62 | 4/21 (19%)  17/21 (81%)  1 | 16/31 (52%)  15/31 (48%)  2  *p*= 0.02* | 7/24 (29%)  17/24 (71%)  1 | 9/26 (35%)  17/26 (65%)  1  *p* = 0.77 |
